# Supplementary material
Source: PubMed Central journal article supplement (PMC5440721)
Supplement: AEM.00547-17_zam999117846s1.pdf [file AEM.00547-17_zam999117846s1.pdf]

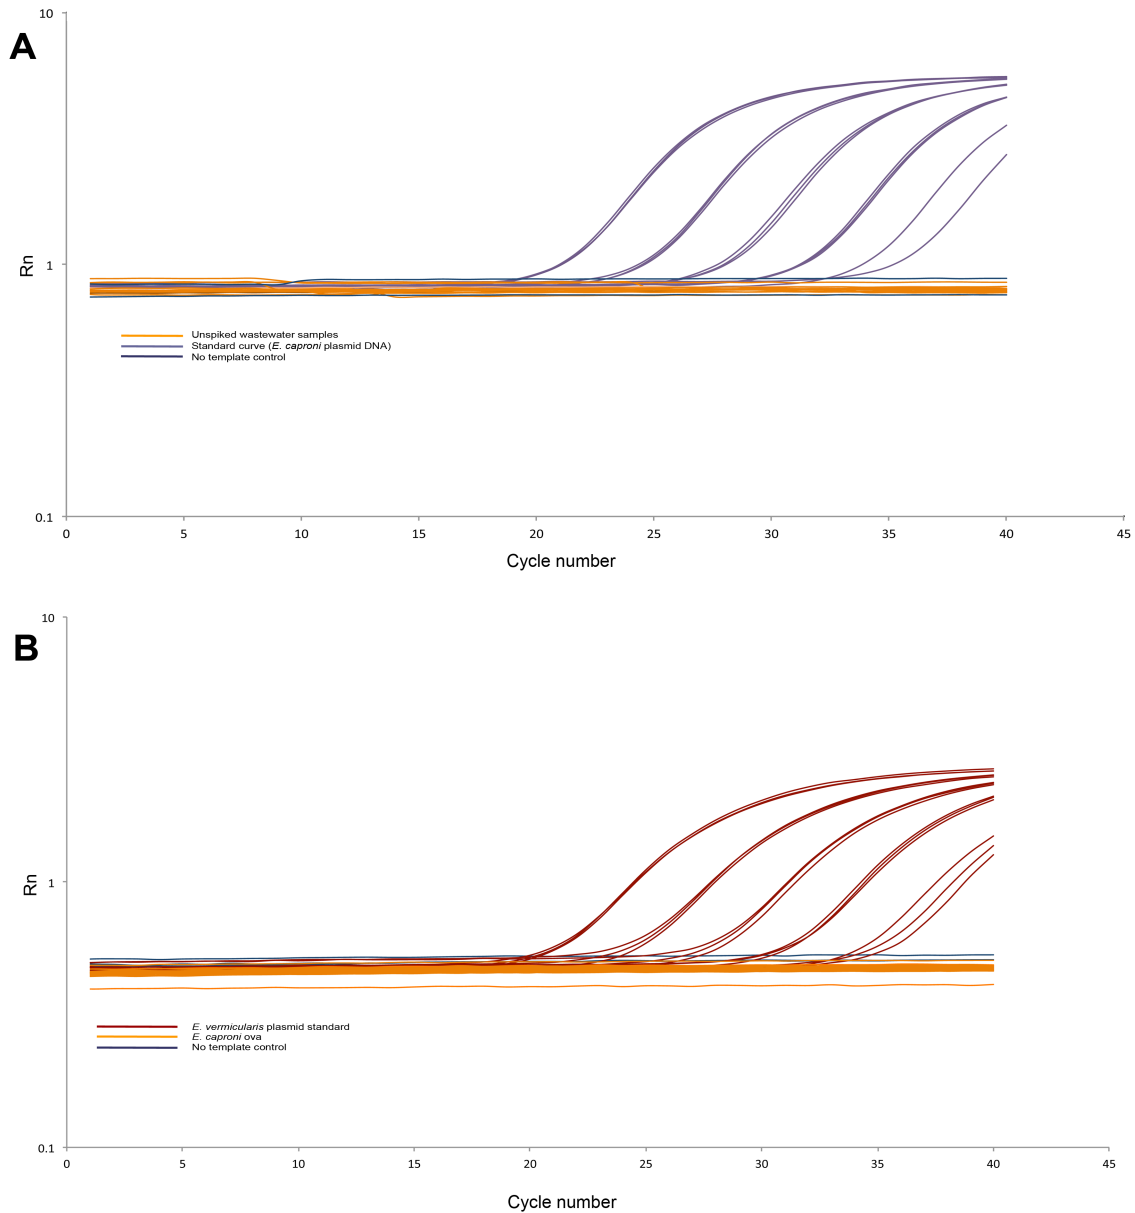

**Figure S1.** A. Wastewater samples from June-September 2015 do not contain *E. caproni* ova. Unspiked water samples were extracted and run using the *E. caproni* qPCR assay. B. *E. vermicularis* primers do not cross-react with *E. caproni* ova. A dilution series of 1, 5, 10, and 20 *E. caproni* ova was extracted and run using the *E. vermicularis* qPCR assay.
